# Supplementary material for: New SLC22A12 (URAT1) Variant Associated with Renal Hypouricemia Identified by Whole-Exome Sequencing Analysis and Bioinformatics Predictions
Source: MDPI journal article supplement (doi:10.3390/genes14091823), 2023-09-20
Supplement: s1 [file s1]

| Chr.                | Position          | Ref.     | Alt.     | Zygosity   | Effect                                       | Gene                   | Ref.     | Alt.     | SNP ID             | Freq.                 | ClinVar |
|---------------------|-------------------|----------|----------|------------|----------------------------------------------|------------------------|----------|----------|--------------------|-----------------------|---------|
| <i>chr4</i>         | 9.909.923         | G        | A        | HET        | missense_variant                             | <i>SLC2A9</i>          | P        | L        | rs2280205          | 0,27                  | Benign  |
| <i>chr4</i>         | 10.022.981        | C        | T        | HET        | missense_variant                             | <i>SLC2A9</i>          | G        | R        | rs2276961          | 0,41                  | Benign  |
| <i>chr4</i>         | 10.027.542        | C        | T        | HET        | missense_variant                             | <i>SLC2A9</i>          | A        | T        | rs6820230          | 0,27                  | .       |
| <i>chr4</i>         | 89.013.496        | C        | T        | HET        | missense_variant                             | <i>ABCG2</i>           | D        | N        | rs34783571         | 3,4 x10 <sup>-3</sup> | .       |
| <i>chr6</i>         | 25.813.150        | G        | A        | HET        | missense_variant                             | <i>SLC17A1</i>         | T        | I        | rs1165196          | 0,72                  | .       |
| <i>chr6</i>         | 43.270.151        | C        | T        | HET        | splice_region_variant&<br>synonymous_variant | <i>SLC22A7</i>         | S        | S        | rs2270860          | 0,46                  | .       |
| <b><i>chr11</i></b> | <b>64.368.335</b> | <b>G</b> | <b>A</b> | <b>HOM</b> | <b>missense_variant</b>                      | <b><i>SLC22A12</i></b> | <b>S</b> | <b>N</b> | <b>rs766798648</b> | .                     | .       |

?

**Table S1. Variants found in genes related to hypouricemia of proband 1.** Variants related to hypouricemia detected by whole exome sequencing in proband 1 after excluding variants in introns and synonymous variants and variants with quality <100. Chr: chromosome, Ref: reference, Var: variant, AA: amino acid, Mut: mutation, Freq: frequency. The genes included in the analysis were: *SLC22A12*, *SLC2A9*, *SLC22A6*, *SLC22A8*, *ABCG2*, *SLC17A1*, *SLC17A3*, *SLC22A7*, *SLC22A11* and *PDZK1*. SNP ID rs766798648 represents mutation p.(S508N) (in bold).

| Chr.         | Position          | Ref.     | Alt.     | Zygotity   | Effect                  | Gene            | Ref.     | Alt.     | SNP ID             | Freq.                 |
|--------------|-------------------|----------|----------|------------|-------------------------|-----------------|----------|----------|--------------------|-----------------------|
| chr1         | 53.543.434        | C        | G        | HET        | missense_variant        | PODN            | N        | K        | .                  | .                     |
| chr2         | 182.399.559       | T        | A        | HET        | missense_variant        | ITGA4           | L        | Q        | rs202038203        | 1,9x10 <sup>-4</sup>  |
| chr3         | 50.231.314        | G        | C        | HET        | splice_region_variant   | GNAT1           | R        | P        | rs755156826        | .                     |
| chr3         | 50.339.759        | T        | C        | HET        | missense_variant        | HYAL1           | Y        | C        | rs1553713151       | .                     |
| chr4         | 106.848.523       | A        | G        | HET        | missense_variant        | NPNT            | E        | G        | .                  | .                     |
| chr5         | 37.341.296        | C        | T        | HET        | missense_variant        | NUP155          | R        | Q        | rs781670166        | .                     |
| chr5         | 176.519.361       | C        | T        | HET        | missense_variant        | FGFR4           | P        | L        | rs938855503        | .                     |
| chr6         | 105.564.608       | A        | G        | HET        | missense_variant        | BVES            | Y        | H        | .                  | .                     |
| chr7         | 814.713           | G        | T        | HET        | missense_variant        | DNAAF5          | R        | L        | rs752259246        | .                     |
| chr7         | 32.619.853        | T        | C        | HET        | missense_variant        | AVL9            | S        | P        | .                  | .                     |
| <b>chr11</b> | <b>64.368.335</b> | <b>G</b> | <b>A</b> | <b>HOM</b> | <b>missense_variant</b> | <b>SLC22A12</b> | <b>S</b> | <b>N</b> | <b>rs766798648</b> | .                     |
| chr11        | 125.791.184       | C        | T        | HET        | missense_variant        | DDX25           | R        | W        | rs755709544        | .                     |
| chr13        | 60.544.191        | A        | T        | HET        | splice_region_variant   | DIAPH3          | I        | N        | .                  | .                     |
| chr14        | 89.878.652        | C        | T        | HET        | missense_variant        | FOXP3           | D        | N        | .                  | .                     |
| chr14        | 92.909.799        | C        | G        | HET        | missense_variant        | SLC24A4         | S        | C        | .                  | .                     |
| chr14        | 100.793.600       | T        | A        | HET        | missense_variant        | SLC25A47        | Y        | N        | rs759814432        | .                     |
| chr15        | 54.614.186        | G        | T        | HET        | missense_variant        | UNC13C          | V        | F        | .                  | .                     |
| chr16        | 20.477.002        | C        | T        | HET        | missense_variant        | ACSM2A          | P        | L        | rs1295547004       | .                     |
| chr16        | 66.547.635        | A        | G        | HET        | splice_region_variant   | TK2             | L        | P        | rs1252881799       | .                     |
| chr16        | 70.190.585        | G        | A        | HET        | missense_variant        | PDPR            | G        | S        | rs774550567        | .                     |
| chr16        | 85.143.966        | G        | A        | HET        | missense_variant        | FAM92B          | R        | W        | rs753996502        | .                     |
| chr17        | 72.306.156        | G        | A        | HET        | splice_region_variant   | DNAI2           | V        | M        | .                  | .                     |
| chr17        | 72.916.296        | C        | G        | HET        | missense_variant        | USH1G           | G        | A        | rs200197601        | 3,9 x10 <sup>-4</sup> |
| chr18        | 77.659.241        | G        | A        | HET        | missense_variant        | KCNG2           | G        | R        | rs541316487        | 1,9 x10 <sup>-4</sup> |
| chr19        | 10.528.421        | C        | T        | HET        | missense_variant        | PDE4A           | P        | L        | .                  | .                     |
| chr19        | 17.449.390        | C        | T        | HET        | missense_variant        | GTPBP3          | T        | I        | rs1179310040       | .                     |
| chr19        | 37.854.409        | A        | T        | HET        | missense_variant        | ZNF875          | H        | L        | rs746467134        | .                     |
| chr21        | 27.071.028        | C        | G        | HET        | missense_variant        | JAM2            | A        | G        | .                  | .                     |

?

**Table S2. Rare variants found in WES of proband 1.** Rare variants detected by whole exome sequencing in proband 1 after excluding variants in introns and UTRs, synonymous variants, variants in databases with frequency >1%, variants with quality <100 and variants with a low probability to be damaging according to SIFT, LRT, MutationTaster, PROVEAN, MutPred and FATHMM. Chr: chromosome, Ref: reference, Var: variant, AA: amino acid, Mut: mutation, Freq: frequency. SNP ID rs766798648 represents mutation p.(S508N) (in bold).

| Chr.        | Position   | Ref.     | Alt. | Zygosity | Effect                                       | Gene           | Ref. | Var. | SNP ID             | Frec.                | ClinVar                |
|-------------|------------|----------|------|----------|----------------------------------------------|----------------|------|------|--------------------|----------------------|------------------------|
| <i>chr4</i> | 9.909.923  | G        | A    | HOM      | missense_variant                             | <i>SLC2A9</i>  | P    | L    | rs2280205          | 0,27                 | Benign                 |
| <i>chr4</i> | 9.922.130  | C        | T    | HOM      | missense_variant                             | <i>SLC2A9</i>  | R    | H    | rs3733591          | 0,29                 | Benign                 |
| <i>chr4</i> | 9.982.251  | C        | T    | HOM      | missense_variant                             | <i>SLC2A9</i>  | G    | R    | <b>rs561633150</b> | 9,9x10 <sup>-4</sup> | Uncertain_significance |
| <i>chr4</i> | 10.027.509 | GA       | G    | HOM      | upstream_gene_variant                        | <i>SLC2A9</i>  | -    | -    | rs61256984         | 0,27                 | .                      |
| <i>chr4</i> | 10.027.542 | C        | T    | HOM      | missense_variant                             | <i>SLC2A9</i>  | A    | T    | rs6820230          | 0,27                 | .                      |
| <i>chr4</i> | 10.027.643 | A        | G    | HOM      | upstream_gene_variant                        | <i>SLC2A9</i>  | -    | -    | rs6449237          | 0,27                 | .                      |
| <i>chr4</i> | 10.027.744 | G        | A    | HOM      | upstream_gene_variant                        | <i>SLC2A9</i>  | -    | -    | rs6449238          | 0,27                 | .                      |
| <i>chr4</i> | 89.080.270 | CAAACACT | C    | HET      | upstream_gene_variant                        | <i>ABCG2</i>   | -    | -    | rs57327643         | 0,03                 | .                      |
| <i>chr6</i> | 25.813.150 | G        | A    | HOM      | missense_variant                             | <i>SLC17A1</i> | T    | I    | rs1165196          | 0,72                 | .                      |
| <i>chr6</i> | 25.862.466 | C        | T    | HET      | missense_variant                             | <i>SLC17A3</i> | A    | T    | rs1165165          | 0,22                 | .                      |
| <i>chr6</i> | 43.270.151 | C        | T    | HOM      | splice_region_variant&<br>synonymous_variant | <i>SLC22A7</i> | S    | S    | rs2270860          | 0,46                 | .                      |

**Table S3. Variants found in genes related to renal ehypouricemia of proband 2.** Variants related to hypouricemia detected by whole exome sequencing in proband 2 after excluding variants in introns and synonymous variants and variants with quality <100. Chr: chromosome, Ref: reference, Var: variant, AA: amino acid, Mut: mutation, Freq: frequency. The genes included in the analysis were: *SLC22A12*, *SLC2A9*, *SLC22A6*, *SLC22A8*, *ABCG2*, *SLC17A1*, *SLC17A3*, *SLC22A7*, *SLC22A11* and *PDZK1*. SNP ID rs561633150 represents mutation p.(G216R) (in bold).

| <i>Chr.</i>  | <i>Position</i> | <i>Ref.</i> | <i>Alt.</i> | <i>Zygosity</i> | <i>Effect</i>                          | <i>Gene</i>     | <i>Ref.</i> | <i>Alt.</i> | <i>SNP ID</i>      | <i>Freq.</i>         |
|--------------|-----------------|-------------|-------------|-----------------|----------------------------------------|-----------------|-------------|-------------|--------------------|----------------------|
| <i>chr1</i>  | 45.796.892      | C           | A           | HET             | stop_gained                            | <i>MUTYH</i>    | E           | X           | rs121908381        | 0,002                |
| <i>chr1</i>  | 54.605.318      | T           | TG          | HOM             | frameshift_variant                     | <i>CDCP2</i>    | -           | -           | rs3841798          | .                    |
| <i>chr1</i>  | 144.866.643     | G           | A           | HET             | missense_variant                       | <i>PDE4DIP</i>  | R           | C           | rs1620560          | .                    |
| <i>chr4</i>  | 87.313          | G           | GA          | HOM             | frameshift_variant                     | <i>ZNF595</i>   | -           | -           | rs60154095         | .                    |
| <i>chr4</i>  | 9.982.251       | C           | T           | HOM             | missense_variant                       | <i>SLC2A9</i>   | G           | R           | <b>rs561633150</b> | 9,9x10 <sup>-4</sup> |
| <i>chr4</i>  | 140.811.083     | GC          | G           | HOM             | frameshift_variant                     | <i>MAML3</i>    | -           | -           | rs373804063        | .                    |
| <i>chr5</i>  | 175.811.094     | C           | CGT         | HOM             | frameshift_variant                     | <i>NOP16</i>    | -           | -           | rs56989856         | .                    |
| <i>chr8</i>  | 144.947.015     | G           | T           | HET             | missense_variant                       | <i>EPPK1</i>    | A           | D           | rs782720515        | .                    |
| <i>chr10</i> | 127.350.414     | C           | T           | HET             | splice_donor_variant&intron_variant    | <i>TEX36</i>    | -           | -           | rs1340966227       | .                    |
| <i>chr11</i> | 1.213.416       | G           | A           | HET             | missense_variant                       | <i>MUC5AC</i>   | R           | Q           | rs78511643         | .                    |
| <i>chr11</i> | 56.143.255      | T           | TGA         | HET             | frameshift_variant                     | <i>OR8U8</i>    | -           | -           | rs754716745        | .                    |
| <i>chr14</i> | 20.666.175      | C           | CA          | HET             | frameshift_variant                     | <i>OR11G2</i>   | -           | -           | rs55781225         | .                    |
| <i>chr16</i> | 31.470.799      | TG          | T           | HET             | frameshift_variant                     | <i>ARMC5</i>    | -           | -           | .                  | .                    |
| <i>chr16</i> | 56.904.646      | A           | C           | HET             | missense_variant&splice_region_variant | <i>SLC12A3</i>  | K           | Q           | rs200086762        | .                    |
| <i>chr16</i> | 89.266.189      | C           | T           | HET             | missense_variant                       | <i>SLC22A31</i> | R           | H           | rs536851687        | .                    |
| <i>chr17</i> | 21.204.210      | C           | T           | HET             | stop_gained                            | <i>MAP2K3</i>   | Q           | X           | rs55796947         | .                    |
| <i>chr17</i> | 21.319.087      | G           | A           | HET             | missense_variant                       | <i>KCNJ12</i>   | G           | S           | rs75029097         | 1,9x10 <sup>-4</sup> |
| <i>chr17</i> | 73.729.656      | G           | A           | HET             | missense_variant                       | <i>ITGB4</i>    | G           | S           | rs746401769        | .                    |
| <i>chr19</i> | 44.933.010      | ACT         | A           | HET             | frameshift_variant                     | <i>ZNF229</i>   | -           | -           | rs772945873        | .                    |
| <i>chr19</i> | 45.659.155      | G           | C           | HET             | missense_variant                       | <i>NKPD1</i>    | D           | E           | rs144764378        | 0,002                |
| <i>chr22</i> | 24.041.250      | T           | C           | HET             | missense_variant                       | <i>RGL4</i>     | W           | R           | rs559617660        | 0,001                |
| <i>chr22</i> | 42.457.056      | C           | T           | HET             | missense_variant                       | <i>NAGA</i>     | E           | K           | rs121434529        | 3,9x10 <sup>-4</sup> |
| <i>chr22</i> | 43.926.845      | C           | T           | HET             | splice_acceptor_variant&intron_variant | <i>EFCAB6</i>   | -           | -           | rs376668505        | 0,001                |

**Table S4. Rare variants found in WES of proband 2.** Rare variants detected by whole exome sequencing in proband 2 after excluding variants in introns and UTRs, synonymous variants, variants in databases with frequency >1%, variants with quality <100 and variants with a low probability to be damaging (score <0,80 in Polyphen). Chr: chromosome, Ref: reference, Var: variant, AA: amino acid, Mut: mutation, Freq: frequency. SNP ID rs561633150 represents mutation p.(G216R) (in bold).





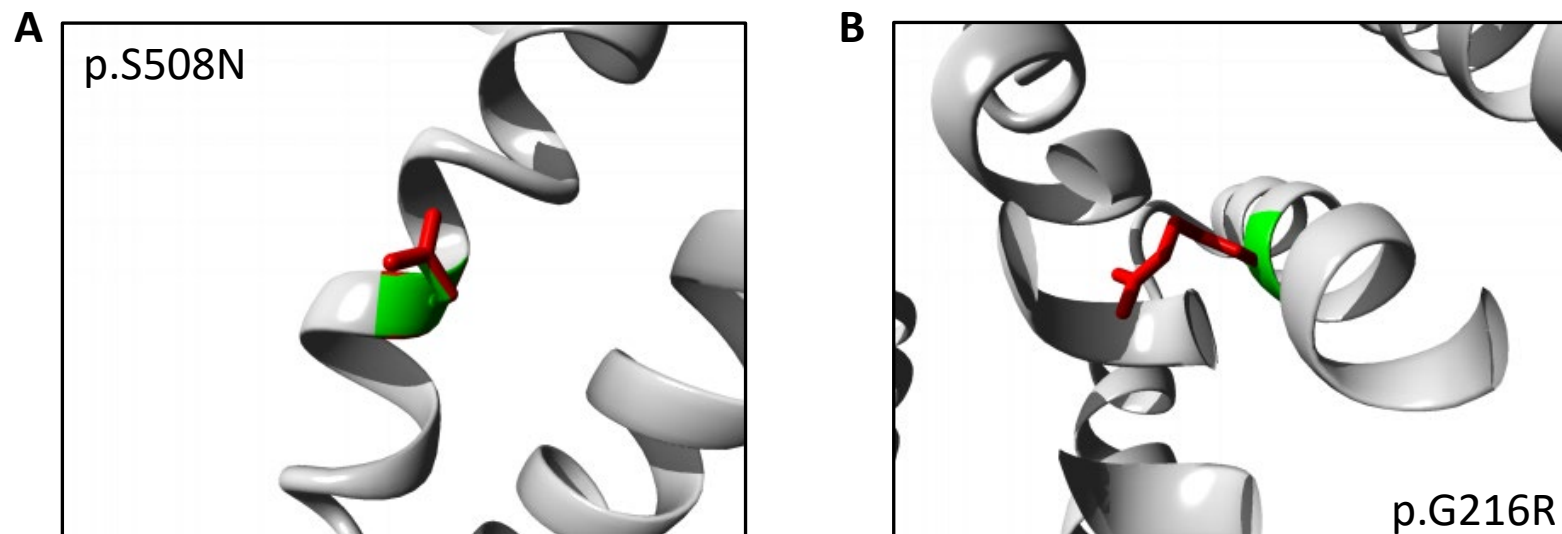

**Figure S2. Close-up of 3D models of URAT1 (A) and GLUT9 (B) obtained by HOPE.** The protein is coloured grey, the side chains of both the wild-type and the mutant residues (p.S508N and p.G216R) are shown and coloured green and red, respectively.
